# Supplementary material for: Vestigialization of an Allosteric Switch: Genetic and Structural Mechanisms for the Evolution of Constitutive Activity in a Steroid Hormone Receptor
Source: PLOS journal article supplement (doi:10.1371/journal.pgen.1004058), 2014-01-09
Supplement: S2 (10.1371/journal.pgen.1004058.s002) [file journal.pgen.1004058.s002.pdf › journal.pgen.1004058.s002.pdf]

Figure S2

A.

|                                  |     |                                                               |     |
|----------------------------------|-----|---------------------------------------------------------------|-----|
| CgER                             | 248 | QTVTILQALNKAALPVLESHHNGQPPTKVHLLNSLVKLAERELVHLINWAKNVPGYTDL   | 307 |
| AncLophoSR                       | 1   | PANQIIISALLKADPPVLYASHDPDLPDTEVHLMTSLIKLADRELVHVINWAKNIPGYTDL | 60  |
| HsERα                            | 311 | TADQMVSALLDAEPPILYSEYDPTTRPFSEASMMGLLTNLADRELVHMINWAKRVPGFVDL | 370 |
| 415                      425     |     |                                                               |     |
| CgER                             | 308 | SLSDQVHLIECCWMELLLLNCAPRSIEHGGKSLAFAPDLVDRSSWSTVE-MTEIFEQVA   | 366 |
| AncLophoSR                       | 61  | SLNDQVHLECCWMELLILGLAWRSMDEHGKRLVFAPDLILDREQARVAG-MTEIFDQIL   | 119 |
| HsERα                            | 371 | TLHDQVHLECAWLEILMIGLVWRSMEHPGK-LLFAPNLLDRNQGKCEGMVEIFDMLL     | 429 |
| 524/525                      536 |     |                                                               |     |
| CgER                             | 367 | AVSEQMMQNHLHKDELLLLQAMVLVNAEVRRLASYNQ-----IFNMQQSLDAIVDT      | 418 |
| AncLophoSR                       | 120 | AISQQFRQLHLNKEEFVLLKAIVLVNSDVRRLSYSK-----IQELQQNIHDALVDT      | 171 |
| HsERα                            | 430 | ATSSRFRMMNLQGEEFVCLKSIILLNSGVYTFLSSTLKSLEEKDHIHRVLDKITDTLIHL  | 489 |
| CgER                             | 419 | AQKY---HPDNVRHVPVAVLLLLTHIRQAGERGIAFFQRLKSEGVVTFCDLLKEMLDAQ   | 473 |
| AncLophoSR                       | 172 | VAKY---HPQNPRRLAQLLLLLPHIRQVSNGGIEHLYSMKSEGAVPLYDLLTEMLDAQ    | 226 |
| HsERα                            | 490 | MAKAGLTLQQQHQLAQLLLLILSHIRHMSNKGMEHLYSMCKKNVVPPLYDLLLLLEMLDAH | 547 |

B.

AncLophoSR  
 CYEVGMNKGSRKERKGSISMSKPAATKRSRADSSDNTVNSTSGSPNPAKSARKSPANQIIISALLKADPPV  
 LYASHDPDLPDTEVHLMTSLIKLADRELVHVINWAKNIPGYTDL  
 SLNDQVHLECCWMELLILGLAWRSMDEHGKRLVFAPDLILDREQARVAGMTEIFDQIL  
 AISQQFRQLHLNKEEFVLLKAIVLVNSDVRRLSYSKIQELQQNIHDALVDT  
 VAKYHPQNPRRLAQLLLLLPHIRQVSNGGIEHLYSMKSEGAVPLYDLLTEMLDAQ  
 DFL  
 EKKSSNEGD\*
