# Supplementary material for: Vestigialization of an Allosteric Switch: Genetic and Structural Mechanisms for the Evolution of Constitutive Activity in a Steroid Hormone Receptor
Source: PLOS journal article supplement (doi:10.1371/journal.pgen.1004058), 2014-01-09

Figure S3

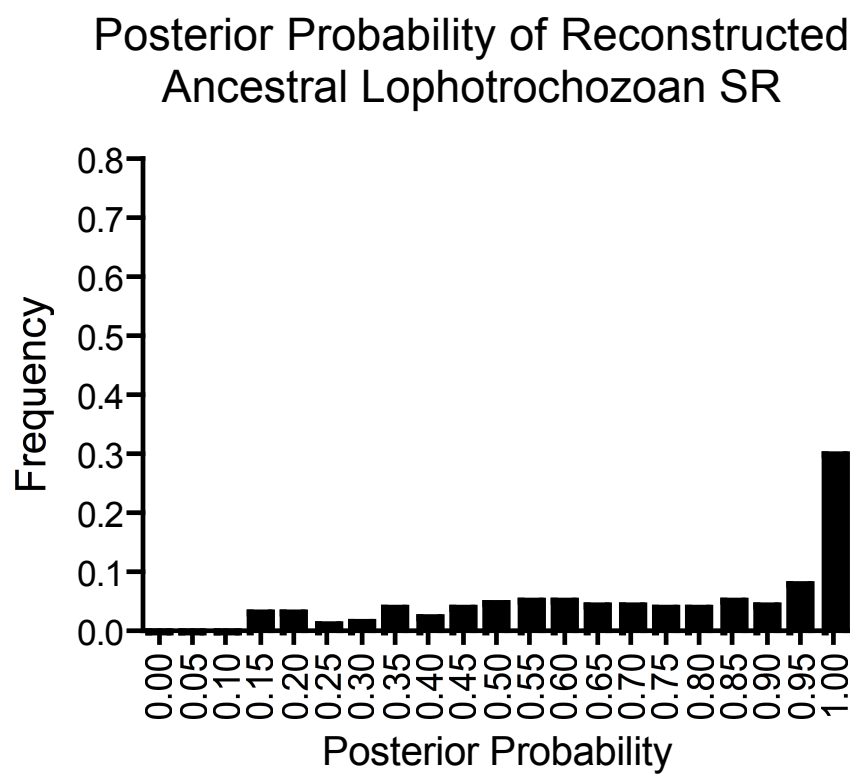

Supplement: S3 (10.1371/journal.pgen.1004058.s003) [file journal.pgen.1004058.s003.pdf › journal.pgen.1004058.s003.pdf]
