# Supplementary material for: Vestigialization of an Allosteric Switch: Genetic and Structural Mechanisms for the Evolution of Constitutive Activity in a Steroid Hormone Receptor
Source: PLOS journal article supplement (doi:10.1371/journal.pgen.1004058), 2014-01-09
Supplement: S6 (10.1371/journal.pgen.1004058.s006) [file journal.pgen.1004058.s006.pdf › journal.pgen.1004058.s006.pdf]

Figure S6

|            |     |          |             |        |         |          |        |              |            |           |
|------------|-----|----------|-------------|--------|---------|----------|--------|--------------|------------|-----------|
| AncLophoSR | 1   | PANQII   | SALLKAD     | PPVLY  | ASHDP   | DLPDTE   | VHLMT  | SLIKLADREL   | VHVINWAK   | NIPGYTDL  |
| AncMoller  | 1   | RSASILE  | ALQKAD      | LPVLE  | SHH     | NHNIP    | PTKVHL | LNSLIKLADREL | VHLINWAK   | HVPGYTDL  |
| AncLophSR  | 61  | SLNDQVHL | LECCWMELL   | ILGLA  | WRSM    | HEGKRLV  | FAPDL  | ILDREQ       | ARVAGMTEIF | DQILA     |
| AncMoller  | 61  | SLSDQVHL | IECCWMELL   | LLNCA  | FRSM    | HEGKRLV  | FAPDL  | VLDRQQ       | WNVTGMTEIF | EQVAA     |
| AncLophSR  | 121 | ISQQFR   | QLHLNKEE    | FVLLKA | IVLVN   | SDVRRLE  | SYSKIQ | ELQQNI       | HDALVDT    | VAKYHPQNP |
| AncMoller  | 121 | VSEQMM   | QYHINKEE    | LLLLQ  | ATVLVN  | AEVRRLA  | SFSKIQ | DMQQS        | ILDALVDT   | AQKYHPDNP |
| AncLophSR  | 181 | RRLAQ    | LLLLLPHIRQ  | VS     | NGIEHLY | SMKSEGA  | VPLYD  | LLTEMLDAQ    |            |           |
| AncMoller  | 181 | RHVPS    | VLLLLLTHIRQ | AGERGI | AYFQ    | KLKREGCV | TFCDLL | TEMLDAQ      |            |           |
