# Supplementary material for: Vestigialization of an Allosteric Switch: Genetic and Structural Mechanisms for the Evolution of Constitutive Activity in a Steroid Hormone Receptor
Source: PLOS journal article supplement (doi:10.1371/journal.pgen.1004058), 2014-01-09
Supplement: S8 (10.1371/journal.pgen.1004058.s008) [file journal.pgen.1004058.s008]

**Table S1** Data collection and refinement statistics for the CgER crystal structure.

|                                                                     | <b>CgER LBD</b>                               |
|---------------------------------------------------------------------|-----------------------------------------------|
| Resolution (highest shell)                                          | 2.60 Å (2.60-2.69 Å)                          |
| Space Group                                                         | P2 <sub>1</sub> 2 <sub>1</sub> 2 <sub>1</sub> |
| Unit Cell Dimensions, Å                                             | a=55.0 b=105.8 c=171.5                        |
|                                                                     | $\alpha=\beta=\gamma= 90.0$                   |
| No. of Reflections                                                  | 26908                                         |
| R <sup>a</sup> <sub>sym</sub> (highest shell)                       | 14.0% (41.6%)                                 |
| R (R <sub>free</sub> ) (highest shell)                              | 21.1% (35.0%)                                 |
| Completeness (highest shell)                                        | 90.1% (64.1%)                                 |
| Ave. Redundance (highest shell)                                     | 7.3 (5.2)                                     |
| I/sigma                                                             | 15.7 (4.2)                                    |
| Monomers per assymmetric unit                                       | 4                                             |
| No. of protein atoms/AU                                             | 7186                                          |
| No. of waters/ AU                                                   | 21                                            |
| R <sup>b</sup> <sub>working</sub> (R <sup>c</sup> <sub>free</sub> ) | 17.0% (24.3 %)                                |
| r.m.s. deviations                                                   |                                               |
| Bond lengths, Å                                                     | 0.009                                         |
| Bond angles, °                                                      | 1.302                                         |
| Average B-factors (Å <sup>2</sup> )                                 |                                               |
| Protein                                                             | 58.8                                          |
| Water                                                               | 51.3                                          |

<sup>a</sup>

R<sub>sym</sub> =  $|I - \langle I \rangle| / \langle I \rangle$ , where I is the observed intensity and  $\langle I \rangle$  is the average intensity of several symmetry-related observations.

<sup>b</sup>

R<sub>working</sub> =  $\|F_o - |F_c|\| / |F_o|$ , where F<sub>o</sub> and F<sub>c</sub> are the observed and calculated structure factors, respectively.

<sup>c</sup>

R<sub>free</sub> =  $\|F_o - |F_c|\| / |F_o|$  for 5% of the data not used at any stage of the structural refinement.
