# Supplementary material for: Vestigialization of an Allosteric Switch: Genetic and Structural Mechanisms for the Evolution of Constitutive Activity in a Steroid Hormone Receptor
Source: PLOS journal article supplement (doi:10.1371/journal.pgen.1004058), 2014-01-09
Supplement: S9 (10.1371/journal.pgen.1004058.s009) [file journal.pgen.1004058.s009.pdf › journal.pgen.1004058.s009.pdf]

**Table S2** Accession numbers for sequences used in the nuclear receptor phylogeny.

| <b>sequence name</b> | <b>species name</b>        | <b>accession number</b> | <b>NR type</b> |
|----------------------|----------------------------|-------------------------|----------------|
| humanCOUP1           | Homo sapiens               | NP_005645               | COUP           |
| humanCOUP2           | Homo sapiens               | P24468                  | COUP           |
| alligatorERa         | Alligator mississippiensis | AB115909                | ER             |
| aplysiaER            | Aplysia californica        | AY327135                | ER             |
| aspidoscelisER       | Aspidoscelis uniparens     | AB055221                | ER             |
| BfER                 | Branchiostoma floridae     | EU371730                | ER             |
| BluetilapiaER        | Oreochromis aureus         | P50240                  | ER             |
| capitellaER          | Capitella capitata         | EU497681                | ER             |
| catfishERa           | Ictalurus punctatus        | AAC69548                | ER             |
| chickER              | Gallus gallus              | P06212                  | ER             |
| CragigER             | Crassostreas gigas         | BAF45381                | ER             |
| croakerERa           | Micropogonias undulatus    | AAG16713                | ER             |
| croakerERb           | Micropogonias undulatus    | AAG16711                | ER             |
| croakerERg           | Micropogonias undulatus    | AAG16712                | ER             |
| eelER                | Anguilla japonica          | BAA19851                | ER             |
| gildedseabreamERa    | Sparus aurata              | AAD31032                | ER             |
| gildedseabreamERB    | Sparus aurata              | AAD31033                | ER             |
| goldfishER           | Carassius auratus          | AAD26921                | ER             |
| hagfishER            | Myxine glutinosa           | EU439936                | ER             |
| humanERa             | Homo sapiens               | P03372                  | ER             |
| humanERb             | Homo sapiens               | BAA24953                | ER             |
| lampreyER            | Petromyzon marinus         | AAK20929                | ER             |
| lottiaER             | Lottia gigantea            | Lotgi1:132166           | ER             |
| MarcorER             | Marisa cornuarietis        | ABI97119                | ER             |
| MedakaER             | Oryzias latipes            | P50241                  | ER             |
| mouseERa             | Mus musculus               | P19785                  | ER             |
| mouseERb             | Mus musculus               | AAB51132                | ER             |
| NuclapER             | Nucella lapillus           | ABQ96884                | ER             |
| octopusER            | Octopus vulgaris           | Q19AB0                  | ER             |
| PlatynereisER        | Platynereis dumerilii      | EU482033                | ER             |
| quailERb             | Coturnix japonica          | AAC36463                | ER             |
| ratERa               | Rattus norvegicus          | CAA43411                | ER             |
| ratERb               | Rattus norvegicus          | AAC52602                | ER             |
| redseabreamER        | Pagrus major               | O42132                  | ER             |
| salmonER             | Salmo salar                | P50242                  | ER             |
| squalusER            | Squalus acanthias          | AAK57823                | ER             |
| thaisER              | Thais clavigera            | BAC66480                | ER             |
| TilapiaER1           | Oreochromis niloticus      | AAD00245                | ER             |
| TilapiaER2           | Oreochromis niloticus      | AAD00246                | ER             |
| xenopusERa           | Xenopus laevis             | P81559                  | ER             |
| zebrafinchERa        | Taeniopygia guttata        | AAB81108                | ER             |
| aedesERR             | Aedes aegypti              | XP_001663736            | ERR            |
| amphioxusERR         | Branchiostoma floridae     | AAU88063                | ERR            |
| beeERR               | Apis mellifera             | XP_392385               | ERR            |
| capitellaERR         | Capitella capitata         | Jgi Capca1 108381       | ERR            |
| chickenERR           | Gallus gallus              | XP_001235147            | ERR            |
| chickenERRb          | Gallus gallus              | XP_001235147.1          | ERR            |
| chickenERRg          | Gallus gallus              | NP_001007082            | ERR            |
| cionaERR             | Ciona intestinalis         | NP_001071700            | ERR            |

|                       |                               |                  |     |
|-----------------------|-------------------------------|------------------|-----|
| cowERRb               | Bos taurus                    | AAI11278         | ERR |
| daphniaERR            | Daphnia pulex                 | Jgi dappu1 46682 | ERR |
| dmelanoERR            | Drosophila melanogaster       | NP_648183        | ERR |
| dpseudoERR            | Drosophila pseudoobscura      | XP_001354210     | ERR |
| fundulusERRa          | Fundulus heteroclitus         | ABB80450         | ERR |
| fundulusERRb          | Fundulus heteroclitus         | ABB80452         | ERR |
| fundulusERRba         | Fundulus heteroclitus         | ABB80451         | ERR |
| fundulusERRg          | Fundulus heteroclitus         | ABB80453         | ERR |
| helobdellaERR         | Helobdella robusta            | jgi Helro 106750 | ERR |
| humanERRa             | Homo sapiens                  | NM_004451        | ERR |
| humanERRb             | Homo sapiens                  | NP_004443        | ERR |
| humanERRg             | Homo sapiens                  | NP_001438        | ERR |
| lottiaERR             | Lottia gigantea               | KC261631         | ERR |
| marisaERR             | Marisa cornuarietis           | ABI97120         | ERR |
| medakaERRa            | Oryzias latipes               | NM_001104917     | ERR |
| medakaERRb1           | Oryzias latipes               | NM_001104918     | ERR |
| medakaERRb2           | Oryzias latipes               | ABQ24187.1       | ERR |
| medakaERRg1           | Oryzias latipes               | NM_001104919     | ERR |
| monodelphisERRg       | Monodelphis domestica         | XP_001375146     | ERR |
| nasoniaERR            | Nasonia vitripennis           | XP_001604033     | ERR |
| paranemertesERR       | Paranemertes peregrina        | ADM73292         | ERR |
| platypusERR           | Ornithorhynchus anatinus      | XP_001510517     | ERR |
| strongylocentrotusERR | Strongylocentrotus purpuratus | XP_784483.2      | ERR |
| trichoplaxNR3         | Trichoplax adherens           | KC261632         | NR3 |
| xenopusERRa           | Xenopus tropicalis            | NP_001072756     | ERR |
| xenopusERRg           | Xenopus tropicalis            | NM_001100210     | ERR |
| zebrafishERRa         | Danio rerio                   | NM_212955        | ERR |
| zebrafishERRb         | Danio rerio                   | AAS66635         | ERR |
| zebrafishERRg         | Danio rerio                   | NP_998118        | ERR |
| BfSR                  | Branchiostoma floridae        | EU371729         | SR  |
| canaryAR              | Serinus canaria               | AAA17402         | SR  |
| chickPR               | Gallus gallus                 | P07812           | SR  |
| crocodilePR           | Crocodylus siamensi           | AAB81722         | SR  |
| eelAR                 | Anguilla japonica             | BAA75464         | SR  |
| eelPR                 | Anguilla japonica             | BAA89539         | SR  |
| flounderGR            | Paralichthys olivaceus        | O73673           | SR  |
| hagfishCR             | Myxine glutinosa              | ABD46742         | SR  |
| hagfishSR2            | Myxine glutinosa              | ABD46743         | SR  |
| halibutGR             | Paralichthys olivaceus        | BAA25997         | SR  |
| haplochromisAR        | Astatotilapia burtoni         | AAD25074         | SR  |
| humanAR               | Homo sapiens                  | NP_000035        | SR  |
| humanGR               | Homo sapiens                  | P04150           | SR  |
| humanMR               | Homo sapiens                  | P08235           | SR  |
| humanPR               | Homo sapiens                  | NP_000917        | SR  |
| lampreyGR             | Petromyzon marinus            | AAK20930         | SR  |
| lampreyPR             | Petromyzon marinus            | AAK20931         | SR  |
| mouseAR               | Mus musculus                  | P19091           | SR  |
| mousePR               | Mus musculus                  | Q00175           | SR  |
| ratMR                 | Rattus norvegicus             | P22199           | SR  |
| redseabreamAR         | Pagrus major                  | BAA33451         | SR  |
| skateAR               | Leucoraja erinacea            | Q1KXY2           | SR  |
| skateGR               | Leucoraja erinacea            | Q1KXY4           | SR  |

|                         |                               |              |           |
|-------------------------|-------------------------------|--------------|-----------|
| skateMR                 | Leucoraja erinacea            | Q1KXY3       | SR        |
| skatePR                 | Leucoraja erinacea            | Q1KXY1       | SR        |
| troutARa                | Oncorhynchus mykiss           | BAA32784     | SR        |
| troutARb                | Oncorhynchus mykiss           | BAA32785     | SR        |
| troutGR                 | Oncorhynchus mykiss           | P49843       | SR        |
| whiptaillizardPR        | Cnemidophorus uniparens       | AAB35740     | SR        |
| xenopusAR               | Xenopus laevis                | AAC97386     | SR        |
| xenopusGR               | Xenopus laevis                | P49844       | SR        |
| xenopusMR               | Xenopus laevis                | Q91573       | SR        |
| xenopusPR               | Xenopus laevis                | AAG42362     | SR        |
| culexFTZF1              | Culex quinquefasciatus        | EDS41949     | SF1/FTZF1 |
| chickSF1                | Gallus gallus                 | BAA76713     | SF1/FTZF1 |
| cionaFTZF1              | Ciona intestinalis            | BAE06460     | SF1/FTZF1 |
| horseSF1                | Equus caballus                | NP_001075320 | SF1/FTZF1 |
| macropusSF1             | Macropus eugenii              | Q95L87       | SF1/FTZF1 |
| metapenaeusFTZF1        | Metapenaeus ensis             | AAD41899     | SF1/FTZF1 |
| mouseSF1                | Mus musculus                  | P33242       | SF1/FTZF1 |
| pleurodelesSF1          | Pleurodeles waltl             | AAS47030     | SF1/FTZF1 |
| ranaSF1                 | Rana rugosa                   | BAA36789     | SF1/FTZF1 |
| turtleSF1               | Trachemys scripta             | AAD01975     | SF1/FTZF1 |
| zebrafishFTZF1          | Danio rerio                   | AAC60274     | SF1/FTZF1 |
| saccoglossusFTZF1       | Saccoglossus kowalevskii      | ACH68437     | SF1/FTZF1 |
| strongylocentrotusFTZF1 | Strongylocentrotus purpuratus | XP_791919    | SF1/FTZF1 |
| humanLRH1               | Homo sapiens                  | AAD03155     | SF1/FTZF1 |
| mouseLRH1               | Mus musculus                  | P45448       | SF1/FTZF1 |
| aedesGCNF               | Aedes aegypti                 | XP_001651525 | GCNF      |
| bombyxGRF               | Bombyx mori                   | NP_001037015 | GCNF      |
| cionaGCNF               | Ciona intestinalis            | BAE06474     | GCNF      |
| humanGCNF               | Homo sapiens                  | AAB50876     | GCNF      |
| mouseGCNF               | Mus musculus                  | NP_034394    | GCNF      |
| pigGCNF                 | Sus scrofa                    | A0P8Z4       | GCNF      |
| xenopusGCNF             | Xenopus tropicalis            | AAH80883     | GCNF      |
| zebrafishGCNF           | Danio rerio                   | NP_571331    | GCNF      |
| humanRXRa               | Homo sapiens                  | P19793       | RXR       |
| humanRXRb               | Homo sapiens                  | P28702       | RXR       |
| humanRXRg               | Homo sapiens                  | P48443       | RXR       |
