# Supplementary material for: Vestigialization of an Allosteric Switch: Genetic and Structural Mechanisms for the Evolution of Constitutive Activity in a Steroid Hormone Receptor
Source: PLOS journal article supplement (doi:10.1371/journal.pgen.1004058), 2014-01-09
Supplement: S10 (10.1371/journal.pgen.1004058.s010) [file journal.pgen.1004058.s010.pdf › journal.pgen.1004058.s010.pdf]

**Table S3** Maximum likelihood sequence and site-specific posterior probabilities for the ancestral lophotrochozoan steroid receptor LBD. Functionally characterized residues are highlighted in red.

| Human ER $\alpha$<br>amino acid<br>number | Site# | ML state | PP    | Alternate<br>state (if<br>PP>0.25) | PP of alt state | pocket<br>residues |
|-------------------------------------------|-------|----------|-------|------------------------------------|-----------------|--------------------|
| 311                                       | 1     | P        | 0.159 |                                    |                 |                    |
| 312                                       | 2     | A        | 0.33  | T                                  | 0.282           |                    |
| 313                                       | 3     | N        | 0.218 |                                    |                 |                    |
| 314                                       | 4     | Q        | 0.319 |                                    |                 |                    |
| 315                                       | 5     | I        | 0.582 |                                    |                 |                    |
| 316                                       | 6     | I        | 0.673 |                                    |                 |                    |
| 317                                       | 7     | S        | 0.349 | A                                  | 0.302           |                    |
| 318                                       | 8     | A        | 0.746 |                                    |                 |                    |
| 319                                       | 9     | L        | 1     |                                    |                 |                    |
| 320                                       | 10    | L        | 0.771 |                                    |                 |                    |
| 321                                       | 11    | K        | 0.749 |                                    |                 |                    |
| 322                                       | 12    | A        | 0.919 |                                    |                 |                    |
| 323                                       | 13    | D        | 0.941 |                                    |                 |                    |
| 324                                       | 14    | P        | 0.997 |                                    |                 |                    |
| 325                                       | 15    | P        | 0.99  |                                    |                 |                    |
| 326                                       | 16    | V        | 0.488 |                                    |                 |                    |
| 327                                       | 17    | L        | 0.681 |                                    |                 |                    |
| 328                                       | 18    | Y        | 0.34  |                                    |                 |                    |
| 329                                       | 19    | A        | 0.521 | S                                  | 0.397           |                    |
| 330                                       | 20    | S        | 0.335 |                                    |                 |                    |
| 331                                       | 21    | H        | 0.961 |                                    |                 |                    |
| 332                                       | 22    | D        | 0.804 |                                    |                 |                    |
| 333                                       | 23    | P        | 0.51  | H                                  | 0.38            |                    |
| 334                                       | 24    | D        | 0.15  |                                    |                 |                    |
| 335                                       | 25    | L        | 0.153 |                                    |                 |                    |
| 336                                       | 26    | P        | 0.998 |                                    |                 |                    |
| 337                                       | 27    | D        | 0.435 |                                    |                 |                    |
| 338                                       | 28    | T        | 0.976 |                                    |                 |                    |
| 339                                       | 29    | E        | 0.61  |                                    |                 |                    |
| 340                                       | 30    | V        | 0.223 |                                    |                 |                    |
| 341                                       | 31    | H        | 0.393 | N                                  | 0.38            |                    |
| 342                                       | 32    | L        | 0.835 |                                    |                 |                    |
| 343                                       | 33    | M        | 0.584 | L                                  | 0.353           |                    |
| 344                                       | 34    | T        | 0.513 |                                    |                 |                    |
| 345                                       | 35    | S        | 0.819 |                                    |                 |                    |
| 346                                       | 36    | L        | 0.994 |                                    |                 | *                  |
| 347                                       | 37    | I        | 0.955 |                                    |                 | *                  |

|     |    |   |       |   |       |   |
|-----|----|---|-------|---|-------|---|
| 348 | 38 | K | 0.661 |   |       |   |
| 349 | 39 | L | 0.999 |   |       | * |
| 350 | 40 | A | 1     |   |       | * |
| 351 | 41 | D | 1     |   |       |   |
| 352 | 42 | R | 0.986 |   |       |   |
| 353 | 43 | E | 0.999 |   |       | * |
| 354 | 44 | L | 1     |   |       |   |
| 355 | 45 | V | 0.989 |   |       |   |
| 356 | 46 | H | 0.554 |   |       |   |
| 357 | 47 | V | 0.47  | I | 0.384 |   |
| 358 | 48 | I | 0.999 |   |       |   |
| 359 | 49 | N | 0.791 |   |       |   |
| 360 | 50 | W | 1     |   |       |   |
| 361 | 51 | A | 1     |   |       |   |
| 362 | 52 | K | 1     |   |       |   |
| 363 | 53 | N | 0.446 |   |       |   |
| 364 | 54 | I | 0.842 |   |       |   |
| 365 | 55 | P | 1     |   |       |   |
| 366 | 56 | G | 1     |   |       |   |
| 367 | 57 | Y | 0.668 | F | 0.332 |   |
| 368 | 58 | T | 0.791 |   |       |   |
| 369 | 59 | D | 0.703 |   |       |   |
| 370 | 60 | L | 1     |   |       |   |
| 371 | 61 | S | 0.993 |   |       |   |
| 372 | 62 | L | 1     |   |       |   |
| 373 | 63 | N | 0.612 |   |       |   |
| 374 | 64 | D | 1     |   |       |   |
| 375 | 65 | Q | 0.992 |   |       |   |
| 376 | 66 | V | 0.975 |   |       |   |
| 377 | 67 | H | 0.879 |   |       |   |
| 378 | 68 | L | 1     |   |       |   |
| 379 | 69 | L | 0.96  |   |       |   |
| 380 | 70 | E | 0.998 |   |       |   |
| 381 | 71 | C | 0.572 | S | 0.399 |   |
| 382 | 72 | C | 0.986 |   |       |   |
| 383 | 73 | W | 1     |   |       |   |
| 384 | 74 | M | 0.966 |   |       | * |
| 385 | 75 | E | 0.996 |   |       |   |
| 386 | 76 | L | 0.734 |   |       |   |
| 387 | 77 | L | 1     |   |       | * |
| 388 | 78 | I | 0.596 |   |       | * |
| 389 | 79 | L | 0.66  | I | 0.25  |   |
| 390 | 80 | G | 0.971 |   |       |   |

|     |     |   |       |   |       |   |
|-----|-----|---|-------|---|-------|---|
| 391 | 81  | L | 0.89  |   |       | * |
| 392 | 82  | A | 0.832 |   |       |   |
| 393 | 83  | W | 0.972 |   |       |   |
| 394 | 84  | R | 1     |   |       | * |
| 395 | 85  | S | 1     |   |       |   |
| 396 | 86  | M | 0.532 | I | 0.289 |   |
| 397 | 87  | D | 0.437 | E | 0.399 |   |
| 398 | 88  | H | 0.978 |   |       |   |
| 399 | 89  | E | 0.311 | K | 0.252 |   |
| 400 | 90  | G | 0.981 |   |       |   |
| 401 | 91  | K | 0.241 |   |       |   |
|     | 92  | R | 0.549 | K | 0.396 |   |
| 402 | 93  | L | 0.996 |   |       |   |
| 403 | 94  | V | 0.508 | I | 0.312 |   |
| 404 | 95  | F | 1     |   |       | * |
| 405 | 96  | A | 1     |   |       |   |
| 406 | 97  | P | 0.999 |   |       |   |
| 407 | 98  | D | 0.996 |   |       |   |
| 408 | 99  | L | 0.996 |   |       |   |
| 409 | 100 | I | 0.521 | V | 0.335 |   |
| 410 | 101 | L | 0.869 |   |       |   |
| 411 | 102 | D | 0.995 |   |       |   |
| 412 | 103 | R | 0.89  |   |       |   |
| 413 | 104 | E | 0.303 |   |       |   |
| 414 | 105 | Q | 0.582 |   |       |   |
| 415 | 106 | A | 0.458 | S | 0.202 |   |
| 416 | 107 | R | 0.565 |   |       |   |
| 417 | 108 | V | 0.565 |   |       |   |
| 418 | 109 | A | 0.795 |   |       |   |
| 419 | 110 | G | 0.956 |   |       |   |
| 421 | 111 | M | 0.974 |   |       | * |
| 422 | 112 | T | 0.144 |   |       |   |
| 423 | 113 | E | 0.784 |   |       |   |
| 424 | 114 | I | 0.997 |   |       | * |
| 425 | 115 | F | 0.644 |   |       |   |
| 426 | 116 | D | 0.361 | E | 0.316 |   |
| 427 | 117 | Q | 0.657 |   |       |   |
| 428 | 118 | I | 0.715 |   |       | * |
| 429 | 119 | L | 0.84  |   |       |   |
| 430 | 120 | A | 0.489 |   |       |   |
| 431 | 121 | I | 0.636 | V | 0.255 |   |
| 432 | 122 | S | 0.539 | A | 0.334 |   |
| 433 | 123 | Q | 0.432 |   |       |   |

|     |     |   |       |   |       |
|-----|-----|---|-------|---|-------|
| 434 | 124 | Q | 0.759 |   |       |
| 435 | 125 | F | 0.99  |   |       |
| 436 | 126 | R | 0.604 |   |       |
| 437 | 127 | Q | 0.486 | E | 0.262 |
| 438 | 128 | L | 0.973 |   |       |
| 439 | 129 | H | 0.379 |   |       |
| 440 | 130 | L | 0.375 | I | 0.306 |
| 441 | 131 | N | 0.401 |   |       |
| 442 | 132 | K | 0.644 | R | 0.339 |
| 443 | 133 | E | 0.987 |   |       |
| 444 | 134 | E | 1     |   |       |
| 445 | 135 | F | 0.567 |   |       |
| 446 | 136 | V | 0.876 |   |       |
| 447 | 137 | L | 0.941 |   |       |
| 448 | 138 | L | 1     |   |       |
| 449 | 139 | K | 0.586 | R | 0.331 |
| 450 | 140 | A | 0.972 |   |       |
| 451 | 141 | I | 0.698 |   |       |
| 452 | 142 | V | 0.678 |   |       |
| 453 | 143 | L | 1     |   |       |
| 454 | 144 | V | 0.721 |   |       |
| 455 | 145 | N | 1     |   |       |
| 456 | 146 | S | 0.717 | A | 0.265 |
| 457 | 147 | D | 0.541 | E | 0.45  |
| 458 | 148 | V | 0.915 |   |       |
| 459 | 149 | R | 0.631 |   |       |
| 460 | 150 | R | 0.481 |   |       |
| 461 | 151 | L | 0.994 |   |       |
| 462 | 152 | E | 0.35  |   |       |
| 463 | 153 | S | 0.699 |   |       |
| 464 | 154 | Y | 0.142 |   |       |
| 465 | 155 | S | 0.175 |   |       |
| 466 | 156 | K | 0.186 |   |       |
| 475 | 157 | I | 0.581 | V | 0.374 |
| 476 | 158 | Q | 0.832 |   |       |
| 477 | 159 | E | 0.259 |   |       |
| 478 | 160 | L | 0.431 | M | 0.409 |
| 479 | 161 | Q | 0.966 |   |       |
| 480 | 162 | Q | 0.717 |   |       |
| 481 | 163 | N | 0.237 |   |       |
| 482 | 164 | I | 0.744 |   |       |
| 483 | 165 | H | 0.484 | L | 0.347 |
| 484 | 166 | D | 0.832 |   |       |

|     |     |   |       |   |       |   |
|-----|-----|---|-------|---|-------|---|
| 485 | 167 | A | 1     |   |       |   |
| 486 | 168 | L | 0.999 |   |       |   |
| 487 | 169 | V | 0.398 |   |       |   |
| 488 | 170 | D | 0.766 |   |       |   |
| 489 | 171 | T | 0.768 |   |       |   |
| 490 | 172 | V | 0.477 |   |       |   |
| 491 | 173 | A | 0.125 |   |       |   |
| 492 | 174 | K | 0.415 | R | 0.285 |   |
| 493 | 175 | Y | 0.154 |   |       |   |
| 497 | 176 | H | 0.429 | Q | 0.276 |   |
| 498 | 177 | P | 0.961 |   |       |   |
| 499 | 178 | Q | 0.353 | E | 0.324 |   |
| 500 | 179 | N | 0.354 |   |       |   |
| 501 | 180 | P | 0.81  |   |       |   |
| 502 | 181 | R | 0.913 |   |       |   |
| 503 | 182 | R | 0.997 |   |       |   |
| 504 | 183 | L | 0.625 |   |       |   |
| 505 | 184 | A | 0.601 |   |       |   |
| 506 | 185 | Q | 0.837 |   |       |   |
| 507 | 186 | L | 0.78  |   |       |   |
| 508 | 187 | L | 0.999 |   |       |   |
| 509 | 188 | L | 0.833 |   |       |   |
| 510 | 189 | L | 0.964 |   |       |   |
| 511 | 190 | L | 1     |   |       |   |
| 512 | 191 | P | 0.813 |   |       |   |
| 513 | 192 | H | 0.996 |   |       |   |
| 514 | 193 | I | 0.831 |   |       |   |
| 515 | 194 | R | 1     |   |       |   |
| 516 | 195 | Q | 0.951 |   |       |   |
| 517 | 196 | V | 0.558 | A | 0.297 |   |
| 518 | 197 | S | 0.904 |   |       |   |
| 519 | 198 | N | 0.224 |   |       |   |
| 520 | 199 | K | 0.536 | R | 0.442 |   |
| 521 | 200 | G | 0.964 |   |       | * |
| 522 | 201 | I | 0.94  |   |       |   |
| 523 | 202 | E | 0.582 |   |       |   |
| 524 | 203 | H | 0.979 |   |       |   |
| 525 | 204 | L | 0.894 |   |       |   |
| 526 | 205 | Y | 0.618 |   |       |   |
| 527 | 206 | S | 0.33  |   |       |   |
| 528 | 207 | M | 0.531 | I | 0.337 | * |
| 529 | 208 | K | 0.984 |   |       |   |
| 530 | 209 | S | 0.175 |   |       |   |

|     |     |          |           |   |       |  |
|-----|-----|----------|-----------|---|-------|--|
| 531 | 210 | E        | 0.702     |   |       |  |
| 532 | 211 | G        | 0.773     |   |       |  |
| 533 | 212 | A        | 0.203     |   |       |  |
| 534 | 213 | V        | 0.999     |   |       |  |
| 535 | 214 | P        | 0.996     |   |       |  |
| 536 | 215 | L        | 0.846     |   |       |  |
| 537 | 216 | Y        | 0.439     | C | 0.354 |  |
| 538 | 217 | D        | 0.998     |   |       |  |
| 539 | 218 | L        | 1         |   |       |  |
| 540 | 219 | L        | 0.996     |   |       |  |
| 541 | 220 | T        | 0.321     |   |       |  |
| 542 | 221 | E        | 1         |   |       |  |
| 543 | 222 | M        | 1         |   |       |  |
| 544 | 223 | L        | 0.999     |   |       |  |
| 545 | 224 | D        | 0.83      |   |       |  |
| 546 | 225 | A        | 0.998     |   |       |  |
| 547 | 226 | Q        | 0.88      |   |       |  |
|     |     | Mean PP= | 0.7284823 |   |       |  |
